1     **Hippocampal-medial prefrontal event segmentation and integration**  
2                     **contribute to episodic memory formation**

3

4     Wei Liu<sup>1</sup>, Yingjie Shi<sup>1</sup>, James N. Cousins<sup>1</sup>, Nils Kohn<sup>1</sup>, Guillén Fernández<sup>1</sup>

5

6             1. Donders Institute for Brain, Cognition and Behaviour, Radboud University Medical Centre,  
7             Nijmegen, The Netherlands

8

9

10    **Correspondence:**

11    Wei Liu

12    Department of Cognitive Neuroscience

13    Donders Institute for Brain, Cognition and Behaviour

14    Radboud University Medical Centre

15    Trigon Building, Kapittelweg 29

16    6525 EN Nijmegen, The Netherlands

17    Tel: +31 (0)24 36 53276

18    E-mail: W.Liu@donders.ru.nl

19

20

21

22

23

1  
2  
3  
4  
5  
6  
7  
8  
9  
10  
11  
12  
13  
14  
15  
16  
17  
18  
19  
20  
21  
22

## Abstract

How do we encode our continuous life experiences for later retrieval? Theories of event segmentation and integration suggest that the hippocampus binds separately represented events into an ordered narrative. Using an open-access functional Magnetic Resonance Imaging (fMRI) movie watching-recall dataset, we quantified neural similarities between separate events during movie watching and related them to subsequent retrieval of events as well as retrieval of sequential order. We demonstrate that distinct *activation patterns* of the hippocampus and medial prefrontal cortex form event memories. By contrast, similar within-region *connectivity patterns* between events facilitate memory formation and are critical for the retention of events in the correct sequential order. We propose that distinct *activation patterns* represent neural segmentation of events while similar *connectivity patterns* act as the ‘chunking code’ for integration across events. Our results provide novel evidence for the role of hippocampal-medial prefrontal event segmentation and integration in episodic memory formation of real-life experience.

**Keywords:** subsequent memory effect; hippocampus; medial prefrontal cortex; event segmentation; event integration

1 **Significance**

2 How do our brains encode continuous life experience? Prior work suggests that the hippocampus

3 represents information with dissimilar patterns to separate them, but it remains unclear how events could

4 be both separated and integrated into the sequenced narrative that characterizes episodic memory. We

5 used functional MRI during movie watching to identify complementary patterns of brain activity in the

6 hippocampus and medial prefrontal cortex that perform these dual operations. Successful encoding was

7 dependent on events being represented with dissimilar *activity patterns*, while a similar *connectivity*

8 *pattern* linked events and preserved the order they were encoded. These findings reveal a network that

9 simultaneously separates and integrates event memories, and highlights the potential of connectivity

10 patterns to examine dynamic memory processes in brains.

11  
12  
13  
14  
15  
16  
17  
18  
19  
20  
21  
22

1 **MAIN TEXT**

2 **Introduction**

3 How we form memories of our life experiences is a fundamental scientific question with broad  
4 implications. In the past two decades, human neuroimaging and electrophysiology studies using the  
5 subsequent memory effect paradigm have implicated a distinct set of brain regions involved in successful  
6 memory formation (1–4). In these subsequent memory studies, increased neural activity of the  
7 hippocampus, parahippocampal gyrus, and the prefrontal cortex during memory encoding is associated  
8 with successful subsequent retrieval. However, real-world memories are formed based on a continuous  
9 stream of information rather than the sequentially presented, isolated items used in most subsequent  
10 memory studies (3). Potentially, continuous sensory experience is segmented into distinct events (i.e.,  
11 event segmentation) (5–7) that are then bound together into a coherent narrative, preserving their  
12 sequential relationships (i.e., event integration) (8). To examine episodic memory formation of real-life-  
13 like experiences in humans, we analysed brain activity using functional Magnetic Resonance Imaging  
14 (fMRI) while participants were watching a movie. Based on subsequent memory recall, we aimed at  
15 identifying brain regions and neural representational processes underlying event segmentation and  
16 integration during episodic memory formation.

17 Thanks to recent advances in statistical analysis of ongoing neural activity (9–12), naturalistic stimuli (e.g.,  
18 movie, spoken narratives, music) have been increasingly used in neuroscience (12–15). This is especially  
19 valuable for memory research because naturalistic stimuli can greatly enhance the ecological validity of  
20 experimental studies (7, 16–18). Hasson and colleagues first investigated memory formation with  
21 cinematographic stimuli and demonstrated that brain activity was more correlated among participants for  
22 later remembered than forgotten events (18). While that study uncovered regions that encode continuous  
23 experiences, the nature of representations in those regions remained unclear, particularly with regard to  
24 how episodes are segmented into separate events and then integrated into a coherent sequence.

1 Event segmentation theory suggests that continuous experiences need to be segmented into discrete event  
2 representations, and thereafter they can be better understood and encoded (6, 19, 20). Two recent studies  
3 provided novel perspectives into segmentation theory. Using Multi-Voxel Pattern Analysis (MVPA) and a  
4 movie watching-recall dataset, Chen and colleagues showed similar *activation patterns* of the same events  
5 across individuals and event-specific reinstatements of *activation patterns* between encoding and retrieval  
6 (16). Following this, Baldassano and colleagues demonstrated a nested processing hierarchy of events  
7 ('hierarchical memory system', (21)) from coarse segmentation in early sensory regions to fine-grained  
8 segmentation in regions of the higher-order default-mode network (e.g., medial prefrontal cortex (mPFC)  
9 and posterior medial cortex (PMC)). Importantly, boundaries of long events at the top of the hierarchy  
10 matched with event boundaries annotated by human observers and were coupled to increased hippocampal  
11 activity (7). These results demonstrated that human brains spontaneously used different *activation patterns*  
12 to represent events during continuous movie watching, and how these *activation patterns* reactivated  
13 during recall. Also, it may suggest that regions such as mPFC, PMC, and hippocampus encode events at  
14 the same level that we consciously perceive boundaries between events. However, it remains unclear how  
15 exactly this event segmentation at the neural level relates to subsequent memory recall.

16 Event segmentation alone is not sufficient for episodic memory formation of continuous real-life  
17 experiences. Temporal context theory suggests that it is essential to integrate segmented events into a  
18 coherent narrative via time, meaning, or other abstract features (22, 23). Therefore, a non-exhaustive list  
19 of questions are: (1) what are the neural underpinnings of event integration during continuous memory  
20 formation, (2) does integration occur in the same brain regions as segmentation, and (3) how does  
21 integration relate to subsequent memory recall. A promising approach to answer these questions is to  
22 examine local *connectivity pattern* (also called *multi-voxel correlation structure*), which may represent a  
23 brain signal that integrates events (24). This method was derived from rodent electrophysiology (25–27)  
24 and has been used in human fMRI studies (28, 29) to quantify distributed memory representations in  
25 neuronal assemblies. Recently, Tambini and Davachi (24) proposed that *activation patterns* are the

1 representations of specific perceptual inputs (e.g., stimuli), while local *connectivity patterns* reflect  
2 particular encoding contexts or states. However, the different mnemonic functions of *activity patterns* and  
3 *connectivity patterns* have yet to be compared empirically within a single study. If local *connectivity*  
4 *patterns* represent encoding context, they may facilitate integration across events. Examination of  
5 *connectivity patterns* alongside *activation patterns* would help to characterise how the brain  
6 simultaneously performs event segmentation and integration.

7 Recently, a hippocampal neural code (chunking code) that simultaneously tracked subdivisions of a  
8 continuous experience (i.e., events) and their sequential relationship was described in rodents' CA1 region  
9 (30). This 'chunking code' could be a fundamental neural code by which episodic experience is integrated,  
10 but has yet to be revealed in humans. Hippocampal activity was found to increase at the boundaries  
11 between two events during continuous experience (5, 7, 31–34), but what these hippocampal signals  
12 represent in terms of event segmentation and integration is not clear. Theoretical models proposed that  
13 increased hippocampal signal may reflect a rapid shift in mental representations (e.g., temporal and/or  
14 contextual information of an event) (35–37). Therefore, it can be regarded as the neural signature of event  
15 segmentation. Alternatively, this increase may link to the integration of episodic memories across event  
16 boundaries, as suggested by scalp electrocorticography (EEG) studies (38, 39) and the event conjunction  
17 framework (8). However, fMRI evidence for the role of hippocampal signals in integration across events  
18 is still limited.

19 The current study aimed to reveal the neural underpinnings of the two processes in question – event  
20 segmentation and event integration - during memory formation of naturalistic experiences. To that end, we  
21 used an existing dataset (7, 16) where participants watched a movie while being scanned (**Figure 1A**) and  
22 afterwards were instructed to freely recall the story of the movie (**Figure 1B**). This design allowed us to  
23 associate different neural measures during episodic encoding with subsequent memory retrieval (**Figure**  
24 **1C-D**). We extracted voxel-wise Blood Oxygenation Level Dependent (BOLD) time courses during  
25 movie watching (encoding) from six predefined regions-of-interest (ROI) in the 'hierarchical memory

1 system' (21) including early auditory and visual areas, posterior medial cortex, medial prefrontal cortex,  
2 hippocampus, and posterior parahippocampal gyrus (**Figure 2A; Figure S1**). To probe the role of a  
3 broader set of regions in event segmentation and integration, we repeated all analyses in each parcel of a  
4 neocortical parcellation (40) (**Figure 2B**). We first examined the relationship between ROI-based activity  
5 time courses and subsequent memory recall and replicated the classical subsequent memory effects (i.e.,  
6 greater activation for *remembered* compared to *forgotten* events) in regions including the hippocampus as  
7 well as the posterior parahippocampal gyrus (**Figure S2-3**, details in **Supplementary Materials**). To  
8 dissociate the two event processes, we used voxel-wise activity (Figure 2C) from each ROI to quantify the  
9 similarity between neural representations of events by two different multivariate methods (i.e., *activation*  
10 and *connectivity patterns*) (**Figure 2D-E**). We reasoned that if the neural representation (*activation* or  
11 *connectivity pattern*) shows a large transition (i.e., negative neural similarity value) between two adjacent  
12 events, and if this dissimilarity associates with better subsequent memory for events, then this  
13 representation might be involved in event segmentation (**Figure 2E**). By contrast, if the neural  
14 representation remains stable (i.e., higher similarity) across two or more neighboring events, and this  
15 stability relates to event memory as well as retention of the correct order for those events (order memory),  
16 then this representation may underlie event integration (**Figure 2F**).

17

## 18 **Results**

### 19 **Subsequent memory performance measured by spoken recall**

20 The dataset (7, 16) is from an experiment in which 17 healthy participants watched a 50-min audio-visual  
21 movie (BBC's Sherlock) while undergoing an fMRI scan (**Figure 2A**). Immediately thereafter,  
22 participants were instructed to verbally recall the movie in as much detail as possible (**Figure 2B**). No  
23 visual or auditory cues were given during the retrieval session.

1 Similar to the previous experiments probing the subsequent memory effect (1, 2, 4), the central purpose of  
2 our analyses was to identify brain regions and their response patterns that predict subsequent recall. To  
3 quantitatively analyse memory retrieval performance, the movie was divided into 50 events based on  
4 major narrative shifts (e.g., director's cuts). Each participant's spoken recall was transcribed and  
5 segmented into events matching those from the movie (**Figure 1B**) (Details in *Methods and Materials*).  
6 The current analyses used the same event annotations for the movie and spoken recall as the original  
7 studies (7, 16).

8 We first calculated recall accuracies for each participant. On average, 68.7% ( $SD = 12\%$ , range 48% -  
9 94%) of the 50 events ( $Mean = 34.4$  events,  $SD = 6$ ) were retrieved successfully (**Figure 2C**). Among  
10 these remembered events, we further defined *in-order* and *out-of-order* events based on whether they were  
11 recalled in the correct sequential order. On average, 58.8% ( $SD = 8\%$ , range 40% - 71%) of the  
12 remembered events were *in-order* (**Figure 2D**).

13

#### 14 **Distinct activation pattern-mediated event segmentation is associated with subsequent retrieval** 15 **success**

16 We quantified neural similarities of event-specific *activation patterns* before and after event boundaries  
17 (i.e., two neighbouring events). Specifically, we generated a voxel-wise *activation pattern* per event by  
18 averaging over all time points in that event. This time-averaged *activation pattern* of all voxels within an  
19 ROI for an event was compared to the pattern of its subsequent event using Pearson's correlation. A  
20 negative Pearson's  $r$  indicates two separate activation patterns and thus distinct neural representations  
21 for two distinct events. We investigated whether *activation pattern* similarities relate to memory formation  
22 by contrasting the pattern similarities of remembered with forgotten events in six ROIs. That is, pattern  
23 similarity between two events was compared to subsequent memory for the first of those events. We found  
24 that subsequently remembered events were associated with lower *activation pattern* similarities than



1 subsequently forgotten events in early auditory cortex ( $t = -3.56$ ,  $p_{\text{FDR}} = 0.007$ , Cohen's  $d = 0.92$ , **Figure**  
2 **3B**), hippocampus ( $t = -3.62$ ,  $p_{\text{FDR}} = 0.007$ , Cohen's  $d = 0.92$ , **Figure 3E**), mPFC ( $t = -2.79$ ,  $p_{\text{FDR}} = 0.01$ ,  
3 Cohen's  $d = 0.80$ , **Figure 3C**) and posterior parahippocampal gyrus (pPHG) ( $t = -2.85$ ,  $p_{\text{FDR}} = 0.01$ ,  
4 Cohen's  $d = 0.89$ , **Figure 3F**). This finding suggests that distinct *activation patterns* for two sequential  
5 events are beneficial for the memory of the first event in that sequence. Early visual areas ( $t = -1.13$ ,  $p_{\text{FDR}}$   
6  $= 0.27$ , Cohen's  $d = 0.35$ , **Figure 3A**) and PMC ( $t = -1.91$ ,  $p_{\text{FDR}} = 0.08$ , Cohen's  $d = 0.65$ , **Figure 3D**) did  
7 not show this marked effect.

8 So far, within-participant comparisons between remembered and forgotten events revealed that differences  
9 in *activation pattern* similarities of several ROIs are related to subsequent memory. Next, we examined  
10 whether a similar relationship is evident across participants. Specifically, we investigated the relationship  
11 between the *event-specific recall rate* (the percentage of participants that successfully recalled a particular  
12 event) and the averaged *activation pattern* similarity for the corresponding event (the first one in the  
13 sequence) across all participants. Consistent with our main analyses, this analysis revealed that the recall  
14 rate negatively correlated with *activation pattern* similarity in the hippocampus ( $r = -0.292$ ,  $p_{\text{raw}} = 0.042$ )  
15 and pPHG ( $r = -0.344$ ,  $p_{\text{raw}} = 0.015$ ), suggesting that events with lower *activation pattern* similarity were  
16 more likely to be recalled (**Figure S5**).

17

## 18 **Similar connectivity pattern-mediated event integration is correlated with subsequent retrieval** 19 **success**

20 Next, we investigated the association between *connectivity patterns* – a different multivariate method to  
21 characterise neural representations – and subsequent memory retrieval. Within-region multi-voxel  
22 *connectivity patterns* were calculated by a voxel-by-voxel pairwise correlation matrix resulting from the  
23 correlations between time courses of all voxels within a given region. This represents the relative  
24 correlation structure between all voxels in a certain region during event processing. We first calculated the

1 event-specific within-region *connectivity patterns* for two sequential events, and then we quantified the  
2 similarity between *connectivity patterns* across event boundaries also using Pearson's  $r$ . Contrasting  
3 similarities of *connectivity patterns* of subsequently remembered and forgotten events allowed us to  
4 examine how transitions in *connectivity patterns* contribute to memory formation. We found higher  
5 *connectivity pattern* similarity for subsequently remembered compared to forgotten events in the early  
6 auditory area ( $t = 2.9$ ,  $p_{\text{FDR}} = 0.02$ , Cohen's  $d = 0.72$ , **Figure 4B**), visual areas ( $t = 3.34$ ,  $p_{\text{FDR}} = 0.01$ ,  
7 Cohen's  $d = 0.74$ , **Figure 4A**), hippocampus ( $t = 3.39$ ,  $p_{\text{FDR}} = 0.01$ , Cohen's  $d = 0.73$ , **Figure 4E**), and  
8 PMC ( $t = 2.79$ ,  $p_{\text{FDR}} = 0.02$ , Cohen's  $d = 0.47$ , **Figure 4D**). The same contrast was not significant for  
9 mPFC ( $t = 1.22$ ,  $p_{\text{FDR}} = 0.23$ , Cohen's  $d = 0.25$ , **Figure 4C**) and pPHG ( $t = 1.36$ ,  $p_{\text{FDR}} = 0.22$ , Cohen's  $d =$   
10  $0.30$ , **Figure 4F**). A follow-up permutation test examining the specificity of subsequent memory effects  
11 (both *activity* and *connectivity patterns*) to actual event boundaries (as opposed to randomly generated  
12 pseudo boundaries) can be found in the **Supplementary Materials (Figure S4 and S6)**.

13 The event-specific correlational analysis demonstrated that the recall rate positively correlated with  
14 *connectivity pattern* similarity in the early auditory area ( $r = 0.327$ ,  $p_{\text{raw}} = 0.022$ ), visual areas ( $r = 0.35$ ,  
15  $p_{\text{raw}} = 0.014$ ), hippocampus ( $r = 0.301$ ,  $p_{\text{raw}} = 0.036$ ), PMC ( $r = 0.341$ ,  $p_{\text{raw}} = 0.017$ ), and pPHG ( $r = 0.341$ ,  
16  $p_{\text{raw}} = 0.017$ ) (**Figure S7**). These results suggest that events with higher connectivity pattern similarity in  
17 these ROIs were more likely to be recalled.

## 18

### 19 **Similar connectivity pattern-mediated event integration preserves sequential order of events in later** 20 **retrieval**

21 So far we have shown the opposite association between our two multivariate neural pattern measures and  
22 subsequent memory performance: distinct *activation patterns*, but similar within-region *connectivity*  
23 *patterns* across events in the early auditory cortex and hippocampus predict retrieval success. This pattern  
24 of results suggests that the *connectivity pattern* may represent the 'chunking code' to integrate events into

1 a continuous sequence. To directly test this ‘chunking code’ hypothesis, we examined the relationship  
2 between *connectivity pattern* similarity and sequential order of subsequent recall. We reasoned that if the  
3 *connectivity patterns* remain stable across event boundaries, events should tend to be recalled in the  
4 correct sequential order. We compared the mean *connectivity pattern* similarities for *in-order* and *out-of-*  
5 *order* events. Controlling for multiple comparisons, we found that *connectivity pattern* similarity in early  
6 visual cortex to be larger for *in-order* compared to *out-of-order* events ( $t = 3.16$ ,  $p_{\text{FDR}} = 0.03$ , Cohen’s  $d =$   
7  $0.47$ , **Figure 5A**). Similar trends that did not survive correction for multiple comparisons were detected in  
8 the hippocampus ( $t = -2.43$ ,  $p_{\text{raw}} = 0.026$ ,  $p_{\text{FDR}} = 0.08$ , Cohen’s  $d = 0.53$ , **Figure 5E**), auditory area ( $t = -$   
9  $2.08$ ,  $p_{\text{raw}} = 0.053$ ,  $p_{\text{FDR}} = 0.084$ , Cohen’s  $d = 0.46$ , **Figure 5B**) and posterior parahippocampal gyrus ( $t = -$   
10  $2.05$ ,  $p_{\text{raw}} = 0.056$ ,  $p_{\text{FDR}} = 0.084$ , Cohen’s  $d = 0.36$ , **Figure 5F**). No such effect was observed in the mPFC  
11 ( $t = -1.35$ ,  $p_{\text{FDR}} = 0.19$ , Cohen’s  $d = 0.19$ , **Figure 5C**), and PMC ( $t = -2.05$ ,  $p_{\text{FDR}} = 0.12$ , Cohen’s  $d = 0.33$ ,  
12 **Figure 5D**).

13

#### 14 **Hippocampal activation and connectivity patterns change differently with event distance**

15 Among our six ROIs, we found converging evidence for a dissociation of event segmentation and  
16 integration in the hippocampus: lower *activation pattern* similarity, but higher *connectivity pattern*  
17 similarity was beneficial for memory formation. Building on these findings, we hypothesized that  
18 hippocampal *activation patterns* of neighboring events should be less similar than events that occur far  
19 apart. By contrast, hippocampal *connectivity patterns* of close events should be more similar than events  
20 with a long interval in between. Thus, we calculated the *activation* and *connectivity pattern* similarity  
21 between all possible combinations of event pairs (‘Event A’ and ‘Event B’) within all 50 events (**Figure**  
22 **6A** and **6D**). For all pairs of events with the same event distance (e.g., separated by four events), we  
23 calculated the mean similarity measure for *activation pattern* and *connectivity pattern* separately. This  
24 calculation was repeated for all possible event distances. To ensure reliable estimations of pattern

1 similarities, we only present the similarities of distances with at least ten event pairs ( $d \leq 40$ ) in the main  
2 text. (Complete calculations can be found in **Figure S8**.)

3 We analysed the hippocampal *activation* and *connectivity patterns* separately. First, our *activation pattern*  
4 analysis found that the shorter the event distance, the more distinct the hippocampal *activation patterns* ( $r$   
5  $= 0.21$ ,  $p_{\text{raw}} = 1.8 \times 10^{-8}$ ; **Figure 6B** and **S9A**). This positive correlation was largely driven by the negative  
6 similarity values between events that occurred close to each other: events separated by a distance of less  
7 than four were represented by two distinct (neural similarity significantly lower than 0) hippocampal  
8 *activation patterns* ( $d = 1$ ,  $t = -5.52$ ,  $p_{\text{FDR}} = 0.0006$ ;  $d = 2$ ,  $t = 3.86 \times 10^{-11}$ ,  $p_{\text{FDR}} = 1.5 \times 10^{-9}$ ;  $d = 3$ ,  $t = 6.75$   
9  $\times 10^{-6}$ ,  $p_{\text{FDR}} = 0.0001$ ;  $d = 4$ ,  $t = -2.98$ ,  $p_{\text{FDR}} = 0.08$ ). Events with a distance larger than or equal to four did  
10 not show markedly distinct *activation patterns* (neural similarity not significantly different from 0)  
11 (**Figure 6B**). Furthermore, we found that subsequent memory recall of Event A modulated the relationship  
12 between event distance ( $d = 1 - 4$ ) and *activation pattern* similarity (ANOVA with event A  $\times$  distance  
13 interaction:  $F(3,48) = 10.1$ ,  $p < 0.001$ ; **Figure 6C**). That is, hippocampal *activation pattern* similarities  
14 increased as the event distance changes from 1 to 4, but only if event A was later recalled ( $F_{\text{remembered}}(3,48)$   
15  $= 9.54$ ,  $p < 0.001$ ;  $F_{\text{forgotten}}(3,48) = 1.35$ ,  $p = 0.268$ ).

16 Second, our *connectivity pattern* analysis found that the shorter the event distance, the more similar the  
17 hippocampal *connectivity patterns* ( $r = -0.439$ ,  $p_{\text{raw}} = 1.8 \times 10^{-33}$ ; **Figure 6E** and **S9B**). At the same time,  
18 across all event distances, the *connectivity pattern* similarities were consistently higher than zero (from  $d$   
19  $= 1$ ,  $t = 31.86$ ,  $p_{\text{FDR}} = 2.29 \times 10^{-14}$  to  $d = 40$ ,  $t = 18.16$ ,  $p_{\text{FDR}} = 4.4 \times 10^{-12}$ ;  $p_{\text{FDR}} < 0.05$  for all  $d$ ). Furthermore,  
20 we found a significant interaction between event A recall and distance ( $F(19, 304) = 2.37$ ,  $p = 0.001$ ), and  
21 a significant main effect of event A ( $F(1, 16) = 7.53$ ,  $p = 0.014$ ). That is, if event A was recalled later, its  
22 hippocampal connectivity pattern was more similar to any other event in the sequence, compared to when  
23 event A was not successfully recalled (**Figure 6F**). This suggests that if *connectivity patterns* between  
24 pairs of events are more similar, for both short and long distances, then events are more likely to be  
25 successfully encoded.

## 1 **Subregions of the prefrontal cortex perform event segmentation and integration**

2 Our ROI-level analyses found that (1) distinct hippocampal *activation patterns* were associated with better  
3 event memory; (2) similar hippocampal *connectivity patterns* were beneficial for event memory; (3)  
4 although not surviving multiple comparison correction, similar hippocampal *connectivity patterns* tended  
5 to preserve the sequential order of events (**Figure 7A**). To investigate whether these relationships are  
6 present in other brain regions beyond our six ROIs, we ran a parcel-based searchlight version of our  
7 pattern similarity analysis to identify overlapping event segmentation and integration computations across  
8 neocortical parcels. In sum, we investigated three potential relationships between neural pattern similarity  
9 and subsequent retrieval separately. First, we identified brain parcels whose lower *activation pattern*  
10 similarities across events were associated with retrieval success (**Figure S10A**). Next, we mapped the  
11 association between higher *connectivity pattern* similarities and retrieval success on each parcel (**Figure**  
12 **S10B**). Then, we identified the parcels, which demonstrated a positive association between *connectivity*  
13 *pattern* similarities and order memory (**Figure S10C**).

14 To identify brain parcels that may support all three neural computations, similar to the hippocampus, we  
15 overlapped spatial patterns for these three effects (all  $p_{\text{FDR}} < 0.05$ ). This revealed a set of brain regions  
16 including relatively large clusters (at least 50 voxels) in the mPFC, right inferior frontal gyrus (IFG),  
17 anterior/middle cingulate cortex and supplementary motor area (SMA), left inferior temporal gyrus (ITG)  
18 and left insular (**Figure 7B**). These results suggest that this network of cortical regions may use the same  
19 neural processes to perform event segmentation and integration as the hippocampus during continuous  
20 memory encoding.

21

## 22 **Discussion**

23 To successfully form memories of our life experiences, we need to segregate continuous experience into  
24 events (5, 7), and integrate those events across their boundaries into a coherent narrative (41). Here we

1 show that distinct hippocampal *activation patterns*, but similar hippocampal *connectivity patterns* across  
2 event boundaries, facilitate these two vital episodic memory functions. We propose that distinct *activation*  
3 *patterns* reflect event segmentation while similar *connectivity patterns* represent a ‘chunking code’ that  
4 integrates separately represented events into a narrative. Supporting this role of *connectivity patterns* for  
5 event integration, we found that similar hippocampal *connectivity patterns* were crucial for the correct  
6 sequential order of subsequent retrieval. Our whole-brain analysis demonstrates that similar  
7 neurocomputations were performed by a network of cortical regions, in particular for the mPFC. Overall,  
8 these results suggest that both hippocampal and medial prefrontal event segmentation and integration  
9 support memory formation of continuous experience.

10 Using multivoxel pattern analysis, we found that distinct local *activation patterns* across event boundaries  
11 in the early auditory area, mPFC, posterior parahippocampal gyrus, and hippocampus, were associated  
12 with better subsequent memory, indexed by more negative similarities of activation patterns between two  
13 adjacent events. The ability to segment continuous experience has been linked to successful memory  
14 encoding in a behavioural experiment (42) and compelling evidence suggested that the hippocampus is  
15 activated around event boundaries (5, 31–34). This hippocampal activity has been proposed to be  
16 associated with a hippocampal segmentation process, but how the hippocampus represents two separate  
17 events, and whether the corresponding neural representations are relevant for memory remained unclear.  
18 Our findings suggest that the hippocampus and other brain regions (e.g., mPFC) segment events by  
19 representing them with two distinct patterns of activity. This is consistent with the role of the  
20 hippocampus in pattern separation: when similar experiences need to be discriminated and encoded, the  
21 underlying hippocampal neural representations tend to be dissimilar (43, 44). This has typically been  
22 studied to show how the brain separates perceptually similar stimuli (i.e., images), but our findings  
23 indicate that a similar separation occurs at the level of events and this determines subsequent memory. The  
24 episodic memory system may use ‘orthogonalized’ neural representations to encode two events for the  
25 purpose of event segmentation. Further, we show these ‘orthogonalized’ neural representations are

1 potentially event-distance dependent: the hippocampus only generates consecutive dissimilar patterns  
2 when events occur relatively close in time. Taken together, this suggests the existence of a brain network  
3 (mainly hippocampus and mPFC) for the continuous segmentation of ongoing experience, and the degree of  
4 neural separation is relevant for memory formation.

5 Complementing this, we found that more similar within-region *connectivity patterns* of several regions  
6 across event boundaries, including again the early auditory area and hippocampus, were associated with  
7 better subsequent recall. Compared to local *activation patterns* (9, 10), within-region *connectivity patterns*  
8 are a less used multivariate approach. Recently, Tambini and Davachi proposed that both *activation* and  
9 *connectivity patterns* could be used to capture neural states during memory encoding and reactivation, but  
10 *connectivity patterns* tend to encode contexts or states instead of particular perceptual inputs (24). Our  
11 results support this notion, whereby *activation patterns* were more event-specific, while *connectivity*  
12 *patterns* were more associated with the temporal context of events. Therefore, the *connectivity pattern* acts  
13 as the ‘chunking code’ to integrate segmented and separately represented events into a coherent narrative.  
14 Previous evidence from invasive recordings of hippocampal neurons in rats (45) and patients with  
15 pharmacologically intractable epilepsy (46) suggested that the temporal context of events is  
16 hippocampally encoded. Specifically, Paz and colleagues found that neuronal activity in the hippocampus  
17 became more correlated across viewing repetitions of short movie clips, which suggests coding of the  
18 temporal context within events (46). Our *connectivity pattern* measure suggests that the hippocampus also  
19 codes temporal context across successive events, integrating them into a narrative.

20 In addition, we found that close event pairs tend to have more similar *connectivity patterns*, and that  
21 *connectivity pattern* similarities are lower for forgotten compared to remembered events. This holds for  
22 event pairs with both short and long distances, suggesting the relevance of similar *connectivity patterns*  
23 for memory formation across the entire narrative. Multi-voxel *connectivity pattern* analysis, as a less used  
24 multivariate neural measure, may be applied as an alternative approach to study how temporal sequences  
25 are neurally represented. Evidence suggests that neural activity in the hippocampal-entorhinal region,

1 measured in both rats and humans, represents the temporal sequence of experience (17, 47–52). Adding to  
2 this evidence, our findings suggest that a stable *connectivity pattern* across events appears to be a marker  
3 of this temporal sequence coding. Future studies are needed to further investigate the precise mnemonic  
4 functions of different neural measures (e.g., *activity pattern*, within-region *connectivity pattern*, and  
5 system-level interaction between regions) during memory formation (24).

6 Our ROI analysis highlights the two functions of the hippocampus in the separate representation of  
7 segmented events and the binding function that linked events into a narrative, and parcel-based searchlight  
8 analysis identified the role of subregions of the prefrontal cortex (e.g., mPFC, IFG), insular, and inferior  
9 temporal gyrus in event segmentation and integration during memory formation. The role of the mPFC in  
10 event integration is particularly thought-provoking. The mPFC is generally implicated in encoding and  
11 retrieval of episodic memories (53, 54). Among its variety of functions in learning and memory (55), the  
12 online integration of events we observed here is consistent with its function in the facilitation of  
13 associative inference (56–60), accumulation of knowledge (61, 62), and integration of new and prior  
14 knowledge (63–65). We propose that the general mnemonic function of mPFC is to establish links  
15 between separate elements across time and space. Taken together, we found that the hippocampus-mPFC  
16 circuit performs event segmentation and integration during memory formation of continuous experience.  
17 These findings demonstrate the contribution of two complementary event processing mechanisms and  
18 underlying neural representations in episodic memory formation. The hierarchical network model of event  
19 segmentation proposes that higher-order regions receive event representations from lower-order  
20 perceptual regions, and then transfer these representations to the hippocampus for storage (7, 21). Our  
21 study suggested that event integration is another key cognitive process involved in event memory by  
22 showing how distinct event representations are integrated by similar *connectivity patterns* of hippocampus  
23 and mPFC.

24 Our study, together with previous studies also combining human fMRI with naturalistic stimuli (7, 16, 18),  
25 demonstrates the potential of this approach to advance our understanding of the human memory system, in



1 particular for the formation of real-life memories. Similar paradigms and analyses can be easily adapted in  
2 clinical (e.g., memory and affective disorders) and developmental neuroimaging studies (e.g., children and  
3 older adults) to reveal changes related to disease or (mal)development. For example, fMRI-based event  
4 segmentation and integration measures could be used to probe how these processes are impaired in  
5 Alzheimer's disease and mild cognitive impairment, how they develop from childhood to adulthood and  
6 diminish in normal ageing. In addition, *connectivity patterns* have the potential to inform our  
7 understanding of other cognitive operations that require integration of information, such as inferential  
8 reasoning (59). However, due to the low temporal resolution of fMRI, the directionality of information  
9 flow between the neocortical regions of the 'hierarchical memory system' (21) and the hippocampus  
10 remains unclear. Future application of deep-source magnetoencephalography (MEG) (e.g., Backus,  
11 Schoffelen, Szabenyi, Hanslmayr, & Doeller, 2016) or intracranial electroencephalography (iEEG) (e.g.,  
12 Jafarpour, Griffin, Lin, & Knight, 2019) with naturalistic memory paradigms may bridge this gap.

13 In sum, we show that the hippocampus and mPFC may perform a dual function during naturalistic  
14 memory formation. Both regions segment events by representing them with distinct *activation patterns*,  
15 while also integrating those events by retaining similar *connectivity patterns* across events, enabling the  
16 representation of a coherent narrative. The ability to measure segmentation- and integration-related neural  
17 operations using fMRI opens new opportunities to investigate the mechanisms of memory encoding for  
18 real-life experience.

19

20

21

22

23

## 1 **Methods**

2

### 3 **1. Participants and procedure**

#### 4 ***1.1 Participants***

5 Twenty-two healthy young adults (10 female, age range 18-26, mean age 20.8 years) participated in the  
6 experiment. All participants were native English speakers and naïve to the BBC crime drama *Sherlock*.

7 Data were discarded from participants with excessive motion ( $> 1$  voxel;  $n = 2$ ), low recall duration ( $< 10$   
8 min;  $n = 2$ ), or sleeping during the experiment ( $n = 1$ ). This leaves 17 participants in total for our analyses.

9 Due to a technical problem, one participant (s5) is missing data for the last 75 s (part of event 49 and all of  
10 event 50) and the affected two events were excluded in the analyses.

#### 11 ***1.2 Procedure***

12 All our analyses are based on the Sherlock Movie Dataset (7, 16); see *Data availability* below) acquired  
13 and pre-processed at Princeton Neuroscience Institute. No similar analysis or results (excluding  
14 behavioural results of recall accuracy) have been reported in previous studies using this dataset.

15 Participants were informed that they would watch a movie and would later be required to recall its content.

16 They were then presented with a 48-min segment of the first episode of the *Sherlock* series (encoding  
17 phase), split into two parts of approximately equal length (23 min and 25 min) and presented in two  
18 consecutive blocks. A 30 s introductory cartoon clip was prepended before each block. Immediately after  
19 the movie presentation, participants were instructed to verbally describe the movie in as much detail as  
20 they could and for as long as they wished (recall phase). They were asked to recall the episode in the  
21 correct sequential order but were permitted to return to earlier points in the narrative if they remembered  
22 further content. Audio was simultaneously recorded by a customized MR-compatible recording system  
23 throughout the recall phase.

### 24 **2. Behavioural data analysis**

## 1 **2.1 Event annotations of the movie and verbal speech recording**

2 The movie was segmented into 48 events by an independent observer, following major shifts in the  
3 narrative (e.g., director's cuts). Including the two introductory cartoon clips, 50 scenes were analysed in  
4 total. The timestamps for both the onset and offset of identified scenes were recorded and aligned across  
5 all participants. Both the onset and offset are referred to as the boundaries of the respective event. This is a  
6 widely used method for event segmentation and has been validated by a data-driven approach (Baldassano  
7 et al., 2017). The length of the scenes ranges from 11 to 180s (Mean  $\pm$  SD: 57.5  $\pm$  41.7 s). Each subject's  
8 verbal speech was transcribed, segmented and matched to the events that were recalled from the movie.

## 9 **2.2 Event and order memory**

10 For each participant, we first asked whether events were successfully recalled or not, as in the classical  
11 subsequent memory paradigm (1, 2, 4). An event was labelled as 'remembered' if any part of the event  
12 was described during the recall. 'Forgotten' events are the ones that were not mentioned throughout the  
13 recall phase.

14 Secondly, *out-of-order* events were identified as a measure of sequential memory. Among all remembered  
15 events, an event was labelled as *out-of-order* if it was not described immediately after its preceding event  
16 in the original movie. For example, if *event 3* is described immediately after *event 1* without mentioning  
17 *event 2*, then *event 3* is an *out-of-order* event. By contrast, if a participant described *event 4, 5, 6*  
18 sequentially during the recall phase, since *event 5, 6* correctly followed their preceding event, *event 5, 6*  
19 were counted as *in-order* events. The first event verbally described in the recall phase was always labelled  
20 as 'not available' in the order memory analysis since it is not preceded by any event. It was possible that a  
21 single scene was mentioned multiple times (in different parts) during the recall, in which case the position  
22 of its first recall was used in the analyses.

## 23 **3. fMRI data analysis**

### 24 **3.1 fMRI data acquisition and pre-processing**

1 fMRI data were acquired using a T2\*-weighted EPI sequence on a 3T Siemens Skyra scanner (20-channel  
2 head coil; TR 1,500 ms; TE 28 ms; flip angle 64, spatial resolution 3\*3\*4 mm<sup>3</sup>). Only data from the  
3 encoding phase were analysed and reported in the current study.

4 A standard pre-processing pipeline was followed using FSL (68), which includes slice timing correction,  
5 motion correction, linear detrending, high-pass filtering (140 s cutoff), co-registration and affine  
6 transformation into 3 mm MNI standard space (16). The time series were shifted 3 TRs (4.5 s) to account  
7 for the Haemodynamic response function (HRF). Data were z-scored across time at every voxel and a 6  
8 mm smoothing kernel was applied.

9 All subsequent analyses were performed on the pre-processed voxel-wise BOLD signal, in units of  
10 functional volume (TR = 1.5 s). Custom MatLab (R2018b, The Mathworks, Natick, MA) and Python  
11 (version 3.6) scripts were used for both Region of Interest and parcellation-based searchlight analysis.

### 12 **3.2 Region of interest (ROI) selection**

13 The six ROIs used in this study were independently defined by Chen and colleagues, in correspondence to  
14 the timescale hierarchy of the event segmentation model (7, 21). Early visual and early auditory cortex  
15 were functionally defined based on inter-subject correlation during an audio-visual movie and an audio  
16 narrative, respectively (69, 70). ROIs for medial prefrontal cortex (mPFC) and posterior medial cortex  
17 (PMC) were taken from the functional atlas derived from resting-state default mode network  
18 ([https://findlab.stanford.edu/functional\\_ROIs.html](https://findlab.stanford.edu/functional_ROIs.html)) from FIND lab at Stanford University (71). The  
19 hippocampus and posterior parahippocampal gyrus were anatomically defined from the probabilistic  
20 Harvard-Oxford Subcortical Structural Atlas (72). Chen and colleagues manually adjust the threshold of  
21 around 50% to ensure better anatomical coverage during the visual check.

### 22 **3.3 Whole-brain parcellation**

23 Alongside the ROI-based analysis, we performed a parcel-based searchlight analysis on the basis of 1000  
24 functionally parcellated cerebral regions

1 [https://github.com/ThomasYeoLab/CBIG/tree/master/stable\\_projects/brain\\_parcellation/Schaefer2018\\_LocalGlobal](https://github.com/ThomasYeoLab/CBIG/tree/master/stable_projects/brain_parcellation/Schaefer2018_LocalGlobal)  
2 ). The parcellation was based on a gradient-weighted Markov Random Field (gwMRF) model,  
3 which integrated local gradient and global similarity approaches (Schaefer et al., 2018). Using both task  
4 and resting-state fMRI acquired from 1489 participants, parcels with functional and connectional  
5 homogeneity within cerebral cortex were generated (hippocampus and subcortical regions were not  
6 included). In this fashion, each of these biologically meaningful and non-overlapping parcels can be  
7 treated in the same way as an independent region similar to an ROI in the following analyses.

### 8 *3.4 fMRI-based neural responses to event boundaries*

#### 9 *3.4.1 Univariate response*

10 BOLD signals were first averaged for each TR across all voxels in an ROI. Then the time series were z-  
11 scored and segmented based on the event annotations mentioned above. The shortest event was 7 volumes  
12 (10.5 s), therefore we averaged 6 volumes at the beginning and end of all events in order to assess the  
13 change in activity between them.

#### 14 *3.4.2 Activation patterns*

15 Voxel-wise BOLD time series from separate events were first extracted based on the onset and offset  
16 timestamps derived from the movie. Multivariate patterns of brain activation were generated for each  
17 event by averaging across all volumes within this event. To assess the similarity between two neighboring  
18 events, the *activation pattern* for each event of interest was correlated with its following event. The  
19 resulting Pearson's correlation coefficient depicted the extent to which similar representational activity  
20 patterns were elicited by neighboring scenes. Lower similarity between two events represented a greater  
21 change in neural patterns across the event boundary.

#### 22 *3.4.3 Connectivity patterns*

1 Intra-regional *connectivity pattern* analyses were conducted based on a method originally used in rodent  
2 electrophysiology studies to quantify the reactivation of sparsely distributed neuron assemblies (25, 27),  
3 and recently used in human fMRI (24, 28, 29). For each event within each brain region, Pearson's  
4 correlations were performed on the extracted  $m \times n$  (volumes  $\times$  voxels) BOLD-fMRI time series, between  
5 each of the  $n$  voxel time series. This yielded an  $n$ -by- $n$  pairwise correlation matrix (containing  $p$  values  
6 indicating the significance of the Pearson's correlations), representing the within-region connectivity  
7 structure for each scene. For two neighboring events, the Pearson's correlation coefficient of their  
8 correlation matrices was calculated to quantify the similarity for *connectivity patterns*. Lower similarity  
9 between two *connectivity patterns* represented a greater change in the intra-region connectivity patterns  
10 across the event boundary.

### 11 **3.5 Relationship between neural responses during encoding and subsequent memory**

#### 12 *3.5.1 Remembered and forgotten events comparisons*

13 We first compared our neural pattern similarities (i.e., *activation pattern* similarity and *connectivity*  
14 *pattern* similarity) at the single-subject level explained above for each brain region (ROI or brain parcel).  
15 The similarity indices (Pearson's  $r$  between two matrices) for both *activation* and *connectivity patterns*  
16 were averaged for the two types of event pairs (*remembered* and *forgotten*) for each participant. If the first  
17 event of the pair was retrieved during the recall phase, the event pair was labelled as *remembered*.  
18 *Remembered* and *forgotten* event pairs were then compared in two separate  $t$ -tests for *activity* and  
19 *connectivity pattern* transitions (indexed by pattern similarity).

20 We further examined the relationship between *connectivity pattern* transitions and order memory (i.e.,  
21 temporal order of event recall). More specifically, *connectivity patterns* were averaged for another two  
22 types of event pairs (i.e., *In-order* or *Out-of-order*) for each participant. If the second event of the pair was  
23 recalled in an incorrect sequential order (e.g., *event 4* was recalled immediately after *event 6*), the event

1 pair was labelled as *Out-of-order*. *Connectivity pattern* transitions for *In-order* and *Out-of-order* event  
2 pairs were then compared with *t*-tests.

### 3 *3.5.2 Event-specific correlational analysis*

4 Thus far we have examined the association between memory and neural pattern similarity in a within-  
5 participant fashion. We then examined whether the likelihood of an event being remembered correlated  
6 with neural responses across participants. The recall rate for an event was the proportion of participants  
7 that remembered it. At the same time, pattern similarity of both *activation* and *connectivity patterns* was  
8 calculated and averaged across all participants, generating the neural transition indices across participants.  
9 Recall rates for all 50 events and their corresponding pattern transition measures were then correlated,  
10 providing a further indication of how subsequent memory related to pattern transitions across boundaries.

### 11 ***3.6 Relationship between hippocampal pattern similarity and event distance***

12 The above analyses focused on neural pattern similarities between two neighboring events. Here, we  
13 examined the hippocampal pattern similarities between events with variable distances. Event distance was  
14 defined as the number of event boundaries between two events (the event distance between event 1 and  
15 event 3 is 2). For each event, we first calculated its *activation* and *connectivity pattern*. Then, we  
16 calculated the *activation* and *connectivity pattern* similarity between all possible combinations of event A-  
17 B pairs ('Event A' is the event which appeared earlier in the temporal sequence and 'Event B' is the one  
18 presented later) within all 50 events. Finally, for each participant and each event distance, two mean  
19 similarities for activation and connectivity pattern were calculated separately. Note that the number of  
20 available pairs decreases as the distance increases (e.g., events 1-50 are the only event pair with a distance  
21 of 49). To ensure a well-powered analysis for every event distance, we only compared event pairs with a  
22 distance less than or equal to 40, meaning at least 10 event pairs contributed to the event distance  
23 calculation. Analysis of all distances ( $d \leq 49$ ) can be found in the **Supplementary Materials**.

1 First, one-sample  $t$ -tests were performed separately on each distance to test the difference between zero  
2 and the distance-specific activation and connectivity pattern similarities. All resulting  $p$  values were  
3 corrected for False Discovery Rate (FDR) based on the number of distances included (from  $d_{\min} = 1$  to  $d_{\max}$   
4 = 40). Next, we used linear regression to examine the relationship between pattern similarity and event  
5 distance. In addition, to investigate how the subsequent memory of the preceding event (event A)  
6 modulates the relationship between event distance and pattern similarity, we ran a two-way ANOVA  
7 (memory \* event distance) using the memory performance (remembered or forgotten) of the preceding  
8 event and event distance (range from 1 to 40) as two independent variables.

#### 9 **4. Statistical analysis**

10 For hypothesis tests involved in the fMRI data analyses, the significance level was set to  $p = 0.05$  (two-  
11 tailed). Except for the permutation test for simulated event boundaries (see **Supplementary Materials**),  $p$   
12 values were based on the parametric testing. To account for the multiple comparisons problem that comes  
13 with multiple ROIs or parcels, all reported  $p$  values in the main text were FDR-corrected ( $p_{\text{FDR}}$ ) (73)  
14 unless otherwise stated ( $p_{\text{raw}}$ ). Specifically, this means correction was made for six tests in ROI analyses,  
15 and 1000 tests for the whole-brain analyses. All significant  $p$  values were reported together with the effect  
16 sizes (Cohen's  $d$  or partial  $\eta^2$ ). The custom modified version of DABEST  
17 (<https://github.com/ACCLAB/DABEST-python>) was used to plot individual data points alongside  
18 bootstrapping-based resampled distributions of the mean difference between conditions (74).

#### 19 **5. Data and code availability**

20 ROI data are available at <http://datasets.datalad.org/?dir=/workshops/mind-2017/sherlock>. Whole-brain  
21 neuroimaging data are available at <https://dataspace.princeton.edu/jspui/handle/88435/dsp01nz8062179>.  
22 Custom code used in this study will be publicly available via the Open Science Framework (OSF) (Link:  
23 [https://osf.io/p68cv/?view\\_only=483703873dae4cfd8b36e9d6df6b8c92](https://osf.io/p68cv/?view_only=483703873dae4cfd8b36e9d6df6b8c92)) upon publication. Further  
24 requests for scripts should be directed to the corresponding author.



## 1 Acknowledgement

2  
3 We thank Dr Janice Chen for sharing the dataset and ROI masks and suggestions on the searchlight  
4 analysis of this manuscript; Kirsten Rittershofer for proofreading this manuscript; Members of the Hasson  
5 and Norman laboratories for their efforts during data acquisition and data sharing. This work was  
6 supported by the Chinese Scholarship Council (PhD fellowship (201606990020)) to W.L), Ministerie van  
7 OCW (Sino-Dutch Bilateral Exchange Scholarship to YJS), and Nuffic Neso China (Orange Tulip  
8 Scholarship to YJS).

## 10 References

- 13 1. A. D. Wagner, *et al.*, Building memories: remembering and forgetting of verbal experiences as predicted by  
14 brain activity. *Science (80-. )*. **281**, 1188–1191 (1998).
- 15 2. J. B. Brewer, Z. Zhao, J. E. Desmond, G. H. Glover, J. D. E. Gabrieli, Making memories: brain activity that  
16 predicts how well visual experience will be remembered. *Science (80-. )*. **281**, 1185–1187 (1998).
- 17 3. H. Kim, Neural activity that predicts subsequent memory and forgetting: a meta-analysis of 74 fMRI studies.  
18 *Neuroimage* **54**, 2446–2461 (2011).
- 19 4. G. Fernández, *et al.*, Real-time tracking of memory formation in the human rhinal cortex and hippocampus.  
20 *Science (80-. )*. **285**, 1582–1585 (1999).
- 21 5. A. N. Williams, M. Postans, C. J. Hodgetts, How the Human Brain Segments Continuous Experience. *J.*  
22 *Neurosci.* **39**, 3172–3174 (2019).
- 23 6. J. M. Zacks, Event Perception and Memory. *Annu. Rev. Psychol.* **71**, 165–191 (2020).
- 24 7. C. Baldassano, *et al.*, Discovering Event Structure in Continuous Narrative Perception and Memory. *Neuron*  
25 **95**, 709-721.e5 (2017).
- 26 8. B. J. Griffiths, L. Fuentemilla, Event conjunction: How the hippocampus integrates episodic memories  
27 across event boundaries. *Hippocampus*, hipo.23161 (2019).
- 28 9. J. D. Cohen, *et al.*, Computational approaches to fMRI analysis. *Nat. Neurosci.* **20**, 304–313 (2017).
- 29 10. G. Xue, The neural representations underlying human episodic memory. *Trends Cogn. Sci.* **22**, 544–561  
30 (2018).
- 31 11. S. A. Nastase, V. Gazzola, U. Hasson, C. Keysers, Measuring shared responses across subjects using  
32 intersubject correlation. *Soc. Cogn. Affect. Neurosci.*, 600114 (2019).
- 33 12. E. J. Hermans, *et al.*, Stress-related noradrenergic activity prompts large-scale neural network  
34 reconfiguration. *Science (80-. )*. **334**, 1151–1153 (2011).
- 35 13. A. Huk, K. Bonnen, B. J. He, Beyond Trial-Based Paradigms: Continuous Behavior, Ongoing Neural  
36 Activity, and Natural Stimuli. *J. Neurosci.* **38**, 7551–7558 (2018).
- 37 14. S. Sonkusare, M. Breakspear, C. Guo, Naturalistic Stimuli in Neuroscience: Critically Acclaimed. *Trends*  
38 *Cogn. Sci.*, 1–16 (2019).
- 39 15. U. Hasson, Y. Nir, I. Levy, G. Fuhrmann, R. Malach, Intersubject synchronization of cortical activity during  
40 natural vision. *Science (80-. )*. **303**, 1634–1640 (2004).
- 41 16. J. Chen, *et al.*, Shared memories reveal shared structure in neural activity across individuals. *Nat. Neurosci.*  
42 **20**, 115 (2017).
- 43 17. M. E. Montchal, Z. M. Reagh, M. A. Yassa, Precise temporal memories are supported by the lateral  
44 entorhinal cortex in humans. *Nat. Neurosci.* **22**, 284–288 (2019).
- 45 18. U. Hasson, O. Furman, D. Clark, Y. Dudai, L. Davachi, Enhanced Intersubject Correlations during Movie  
46 Viewing Correlate with Successful Episodic Encoding. *Neuron* **57**, 452–462 (2008).
- 47 19. J. M. Zacks, N. K. Speer, K. M. Swallow, T. S. Braver, J. R. Reynolds, Event perception: a mind-brain  
48 perspective. *Psychol. Bull.* **133**, 273 (2007).
- 49 20. J. M. Zacks, B. Tversky, G. Iyer, Perceiving, remembering, and communicating structure in events. *J. Exp.*  
50 *Psychol. Gen.* **130**, 29 (2001).
- 51 21. U. Hasson, J. Chen, C. J. Honey, Hierarchical process memory: memory as an integral component of  
52 information processing. *Trends Cogn. Sci.* **19**, 304–313 (2015).
- 53 22. M. W. Howard, M. S. Fotedar, A. V. Datey, M. E. Hasselmo, The temporal context model in spatial  
54 navigation and relational learning: toward a common explanation of medial temporal lobe function across  
55 domains. *Psychol. Rev.* **112**, 75 (2005).

- 1 23. M. W. Howard, H. Eichenbaum, The hippocampus, time, and memory across scales. *J. Exp. Psychol. Gen.*  
2 **142**, 1211 (2013).
- 3 24. A. Tambini, L. Davachi, Awake Reactivation of Prior Experiences Consolidates Memories and Biases  
4 Cognition. *Trends Cogn. Sci.*, 1–15 (2019).
- 5 25. C. S. Lansink, *et al.*, Preferential reactivation of motivationally relevant information in the ventral striatum. *J.*  
6 *Neurosci.* **28**, 6372–6382 (2008).
- 7 26. H. S. Kudrimoti, C. A. Barnes, B. L. McNaughton, Reactivation of hippocampal cell assemblies: effects of  
8 behavioral state, experience, and EEG dynamics. *J. Neurosci.* **19**, 4090–4101 (1999).
- 9 27. Y.-L. Qin, B. L. McNaughton, W. E. Skaggs, C. A. Barnes, Memory reprocessing in corticocortical and  
10 hippocampocortical neuronal ensembles. *Philos. Trans. R. Soc. London. Ser. B Biol. Sci.* **352**, 1525–1533  
11 (1997).
- 12 28. E. J. Hermans, *et al.*, Persistence of amygdala–hippocampal connectivity and multi-voxel correlation  
13 structures during awake rest after fear learning predicts long-term expression of fear. *Cereb. Cortex* **27**,  
14 3028–3041 (2017).
- 15 29. A. Tambini, L. Davachi, Persistence of hippocampal multivoxel patterns into postencoding rest is related to  
16 memory. *Proc. Natl. Acad. Sci. U. S. A.* **110**, 19591–19596 (2013).
- 17 30. C. Sun, W. Yang, J. Martin, S. Tonegawa, CA1 pyramidal cells organize an episode by segmented and  
18 ordered events. *bioRxiv*, 565689 (2019).
- 19 31. A. Ben-Yakov, R. N. Henson, The Hippocampal Film Editor: Sensitivity and Specificity to Event  
20 Boundaries in Continuous Experience. *J. Neurosci.* **38**, 10057–10068 (2018).
- 21 32. A. Ben-Yakov, Y. Dudai, Constructing realistic engrams: poststimulus activity of hippocampus and dorsal  
22 striatum predicts subsequent episodic memory. *J. Neurosci.* **31**, 9032–9042 (2011).
- 23 33. S. DuBrow, L. Davachi, The influence of context boundaries on memory for the sequential order of events. *J.*  
24 *Exp. Psychol. Gen.* **142**, 1277 (2013).
- 25 34. A. Ben-Yakov, N. Eshel, Y. Dudai, Hippocampal immediate poststimulus activity in the encoding of  
26 consecutive naturalistic episodes. *J. Exp. Psychol. Gen.* **142**, 1255 (2013).
- 27 35. S. DuBrow, N. Rouhani, Y. Niv, K. A. Norman, Does mental context drift or shift? *Curr. Opin. Behav. Sci.*  
28 **17**, 141–146 (2017).
- 29 36. C. Ranganath, M. Ritchey, Two cortical systems for memory-guided behaviour. *Nat. Rev. Neurosci.* **13**, 713  
30 (2012).
- 31 37. S. DuBrow, L. Davachi, Temporal binding within and across events. *Neurobiol. Learn. Mem.* **134**, 107–114  
32 (2016).
- 33 38. I. Sols, S. DuBrow, L. Davachi, L. Fuentemilla, Event Boundaries Trigger Rapid Memory Reinstatement of  
34 the Prior Events to Promote Their Representation in Long-Term Memory. *Curr. Biol.* **27**, 3499-3504.e4  
35 (2017).
- 36 39. M. Silva, C. Baldassano, L. Fuentemilla, Rapid Memory Reactivation at Movie Event Boundaries Promotes  
37 Episodic Encoding. *J. Neurosci.* **39**, 8538–8548 (2019).
- 38 40. A. Schaefer, *et al.*, Local-global parcellation of the human cerebral cortex from intrinsic functional  
39 connectivity MRI. *Cereb. Cortex* **28**, 3095–3114 (2017).
- 40 41. B. J. Griffiths, L. Fuentemilla, Event conjunction: How the hippocampus integrates episodic memories  
41 across event boundaries. *PsyArXiv*, 1–15 (2019).
- 42 42. J. Q. Sargent, *et al.*, Event segmentation ability uniquely predicts event memory. *Cognition* **129**, 241–255  
43 (2013).
- 44 43. M. A. Yassa, C. E. L. Stark, Pattern separation in the hippocampus. *Trends Neurosci.* **34**, 515–525 (2011).
- 45 44. A. Bakker, C. B. Kirwan, M. Miller, C. E. L. Stark, Pattern separation in the human hippocampal CA3 and  
46 dentate gyrus. *Science (80-. )*. **319**, 1640–1642 (2008).
- 47 45. J. R. Manns, M. W. Howard, H. Eichenbaum, Gradual changes in hippocampal activity support remembering  
48 the order of events. *Neuron* **56**, 530–540 (2007).
- 49 46. R. Paz, *et al.*, A neural substrate in the human hippocampus for linking successive events. *Proc. Natl. Acad.*  
50 *Sci.* **107**, 6046–6051 (2010).
- 51 47. J. L. Bellmund, L. Deuker, C. F. Doeller, Mapping sequence structure in the human lateral entorhinal cortex.  
52 *Elife* **8**, 458133 (2019).
- 53 48. O. Lositsky, *et al.*, Neural pattern change during encoding of a narrative predicts retrospective duration  
54 estimates. *Elife* **5**, 1–40 (2016).
- 55 49. C. J. MacDonald, K. Q. Lepage, U. T. Eden, H. Eichenbaum, Hippocampal “time cells” bridge the gap in  
56 memory for discontinuous events. *Neuron* **71**, 737–749 (2011).

- 1 50. E. Pastalkova, V. Itskov, A. Amarasingham, G. Buzsáki, Internally generated cell assembly sequences in the  
2 rat hippocampus. *Science* (80-. ). **321**, 1322–1327 (2008).
- 3 51. S. Thavabalasingam, E. B. O’Neil, J. Tay, A. Nestor, A. C. H. Lee, Evidence for the incorporation of  
4 temporal duration information in human hippocampal long-term memory sequence representations. *Proc.*  
5 *Natl. Acad. Sci.* **116**, 6407–6414 (2019).
- 6 52. A. Tsao, *et al.*, Integrating time from experience in the lateral entorhinal cortex. *Nature* **561**, 57 (2018).
- 7 53. H. Kim, Dissociating the roles of the default-mode, dorsal, and ventral networks in episodic memory  
8 retrieval. *Neuroimage* **50**, 1648–1657 (2010).
- 9 54. M. D. Rugg, K. L. Vilberg, Brain networks underlying episodic memory retrieval. *Curr. Opin. Neurobiol.* **23**,  
10 255–260 (2013).
- 11 55. G. Fernández, *Cognitive Neuroscience of Memory Consolidation* (2017) [https://doi.org/10.1007/978-3-319-](https://doi.org/10.1007/978-3-319-45066-7)  
12 [45066-7](https://doi.org/10.1007/978-3-319-45066-7).
- 13 56. D. Zeithamova, A. L. Dominick, A. R. Preston, Hippocampal and ventral medial prefrontal activation during  
14 retrieval-mediated learning supports novel inference. *Neuron* **75**, 168–179 (2012).
- 15 57. K. N. Spalding, *et al.*, Ventromedial prefrontal cortex is necessary for normal associative inference and  
16 memory integration. *J. Neurosci.* **38**, 3767–3775 (2018).
- 17 58. M. L. Schlichting, D. Zeithamova, A. R. Preston, CA1 subfield contributions to memory integration and  
18 inference. *Hippocampus* **24**, 1248–1260 (2014).
- 19 59. A. R. Preston, H. Eichenbaum, Interplay of hippocampus and prefrontal cortex in memory. *Curr. Biol.* **23**,  
20 R764–R773 (2013).
- 21 60. M. L. Schlichting, A. R. Preston, Memory integration: neural mechanisms and implications for behavior.  
22 *Curr. Opin. Behav. Sci.* **1**, 1–8 (2015).
- 23 61. R. M. W. J. Berkens, *et al.*, Neural dynamics of accumulating and updating linguistic knowledge structures.  
24 *bioRxiv*, 495168 (2018).
- 25 62. D. Kumaran, J. J. Summerfield, D. Hassabis, E. A. Maguire, Tracking the emergence of conceptual  
26 knowledge during human decision making. *Neuron* **63**, 889–901 (2009).
- 27 63. M. T. R. van Kesteren, *et al.*, Differential roles for medial prefrontal and medial temporal cortices in schema-  
28 dependent encoding: from congruent to incongruent. *Neuropsychologia* **51**, 2352–2359 (2013).
- 29 64. M. T. R. van Kesteren, M. Rijpkema, D. J. Ruiters, G. Fernández, Retrieval of associative information  
30 congruent with prior knowledge is related to increased medial prefrontal activity and connectivity. *J.*  
31 *Neurosci.* **30**, 15888–15894 (2010).
- 32 65. M. T. R. van Kesteren, M. Rijpkema, D. J. Ruiters, R. G. M. Morris, G. Fernández, Building on prior  
33 knowledge: schema-dependent encoding processes relate to academic performance. *J. Cogn. Neurosci.* **26**,  
34 2250–2261 (2014).
- 35 66. A. R. Backus, J.-M. Schoffelen, S. Szabéni, S. Hanslmayr, C. F. Doeller, Hippocampal-prefrontal theta  
36 oscillations support memory integration. *Curr. Biol.* **26**, 450–457 (2016).
- 37 67. A. Jafarpour, S. Griffin, J. J. Lin, R. T. Knight, Medial orbitofrontal cortex, dorsolateral prefrontal cortex,  
38 and hippocampus differentially represent the event saliency. *J. Cogn. Neurosci.* **31**, 874–884 (2019).
- 39 68. M. Jenkinson, C. F. Beckmann, T. E. J. Behrens, M. W. Woolrich, S. M. Smith, *Fsl. Neuroimage* **62**, 782–  
40 790 (2012).
- 41 69. J. Chen, *et al.*, Accessing real-life episodic information from minutes versus hours earlier modulates  
42 hippocampal and high-order cortical dynamics. *Cereb. Cortex* **26**, 3428–3441 (2016).
- 43 70. E. Simony, *et al.*, Dynamic reconfiguration of the default mode network during narrative comprehension.  
44 *Nat. Commun.* **7**, 12141 (2016).
- 45 71. W. R. Shirer, S. Ryali, E. Rykhlevskaia, V. Menon, M. D. Greicius, Decoding subject-driven cognitive states  
46 with whole-brain connectivity patterns. *Cereb. cortex* **22**, 158–165 (2012).
- 47 72. R. S. Desikan, *et al.*, An automated labeling system for subdividing the human cerebral cortex on MRI scans  
48 into gyral based regions of interest. *Neuroimage* **31**, 968–980 (2006).
- 49 73. C. R. Genovese, N. A. Lazar, T. Nichols, Thresholding of statistical maps in functional neuroimaging using  
50 the false discovery rate. *Neuroimage* **15**, 870–878 (2002).
- 51 74. J. Ho, T. Tumkaya, S. Aryal, H. Choi, A. Claridge-Chang, Moving beyond P values: data analysis with  
52 estimation graphics. *Nat. Methods* **16**, 565–566 (2019).
- 53  
54  
55  
56

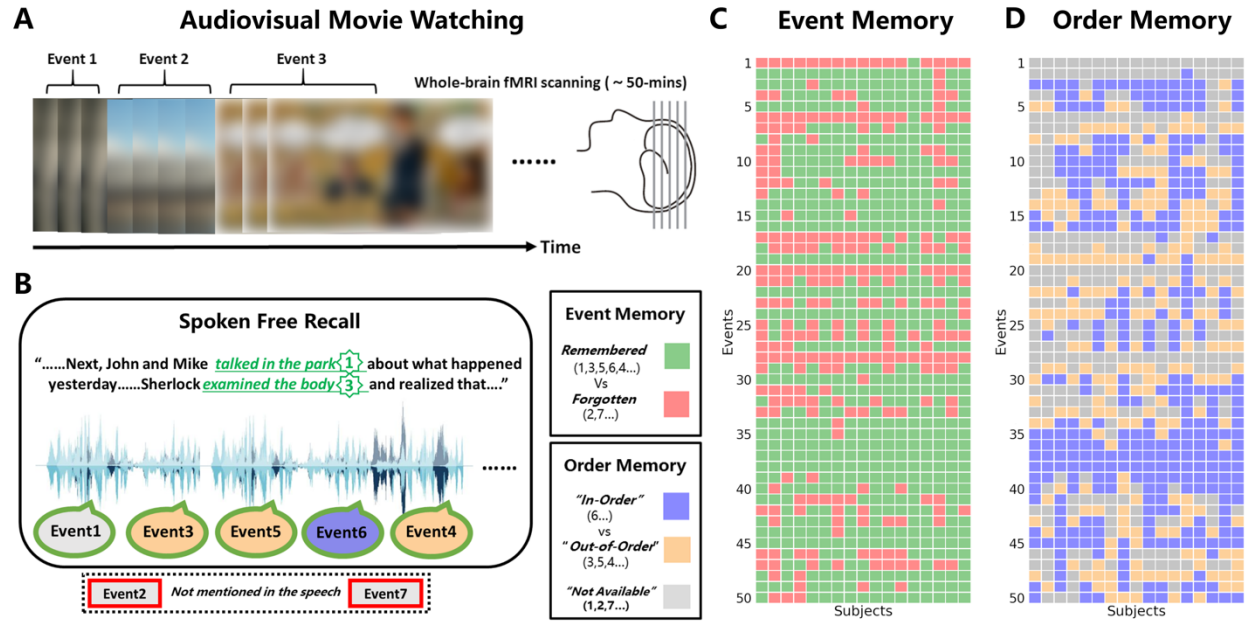

**Figure 1. Experimental procedure and behavioural performance.** (A) Each participant watched a 50-min audiovisual movie, BBC's Sherlock (season 1, episode 1), while brain activity was recorded with fMRI. The movie was divided into 50 events based on major narrative shifts. Blurred images are shown here due to copyright reasons. However, the movie was shown in high resolution during the experiment. (B) Immediately after movie-watching, participants verbally recalled the movie content in as much detail as possible without any visual or auditory cues. Speech was recorded using a microphone and then transcribed. Critically, speech was also segmented into events and matched with the events segmented from the movie. All events mentioned in the speech were labelled as *remembered* while missing events were labelled as *forgotten*. In addition, among those remembered events, the ones that were recalled in the correct sequential order were labelled as *in-order* events (e.g., *event 6* was recalled after *event 5*). *Out-of-order* events were those that were recalled in an incorrect sequential order (e.g., *event 4* was recalled after *event 6*). We labelled the first recalled event and all *forgotten* events as *not available* because no sequential information can be accessed. (C) Illustration of all *remembered* and *forgotten* events during movie-watching in all participants. (D) Illustration of all *in-order* and *out-of-order* events during movie watching in all participants. Each row of the heatmap is a different event, and each column represents a participant.

1  
2  
3  
4  
5  
6  
7  
8  
9  
10  
11  
12  
13  
14  
15  
16  
17  
18  
19  
20  
21  
22  
23  
24  
25  
26  
27  
28  
29

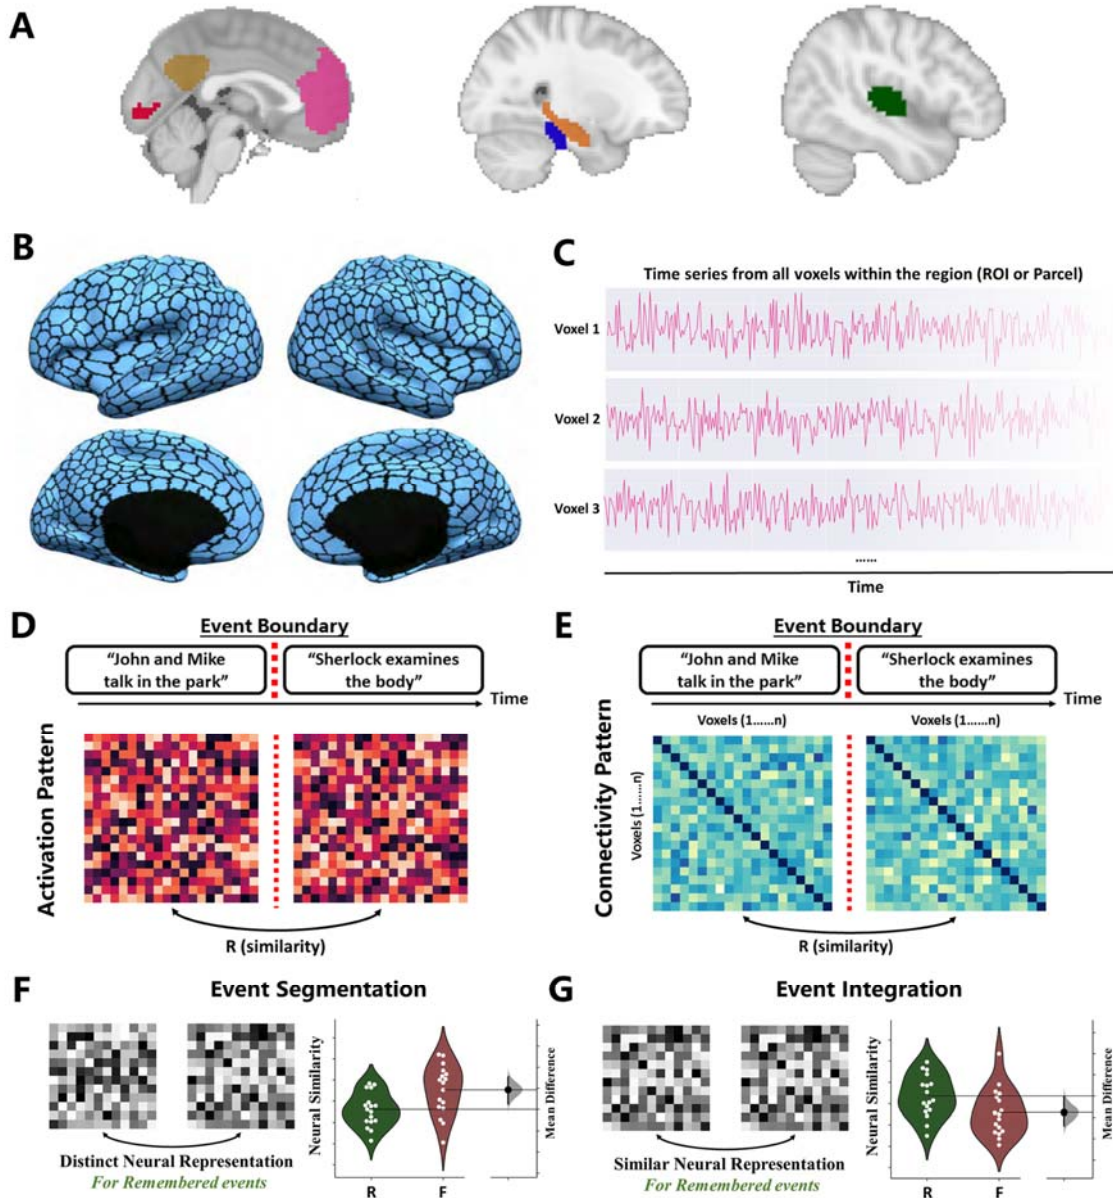

1  
2 **Figure 2. Neural similarities between separate events and their link with subsequent memory recall.** (A) Six predefined  
3 regions-of-interest (ROIs): early auditory (green) and visual area (red), posterior medial cortex (brown), medial prefrontal cortex  
4 (pink), hippocampus (blue), and posterior parahippocampal gyrus (orange). See also **Supplementary Figure 1.** (B) Neocortical  
5 parcellation (1000 parcels) used in searchlight analysis. (C) For each region (ROI or parcel), voxel-wise signal during movie  
6 watching was extracted and then segmented into 50 events based on the event annotations. (D) We first generated event-specific  
7 *activation patterns* by averaging over all time points in that event. Then *activation pattern* similarity was calculated by Pearson's  
8 correlation between *activation patterns* of two sequential events. If a region encodes two events separately, we expect two distinct  
9 neural representations and therefore a negative correlation (i.e., lower than zero). (E) Event-specific within-region *connectivity*  
10 *patterns* were represented by voxel-by-voxel pairwise correlation matrices. *Connectivity pattern* similarity across event  
11 boundaries was also calculated using Pearson's *r* between two sequential events. Stable neural representations across two events  
12 should yield a positive correlation (i.e., higher than zero) in the corresponding region. (F) fMRI evidence for event segmentation.  
13 For a certain multivariate neural measure, if it can be found that two distinct neural representations are used to encode the  
14 adjacent events while the neural patterns for remembered ('R') events are more dissimilar compared to forgotten ('F') events, this  
15 measure is likely to be associated with event segmentation. (G) fMRI evidence for event integration. If the multivariate neural  
16 measure remains stable across the boundary of two neighboring events and remembered ('R') events have higher neural similarity  
17 compared to forgotten ('F') events, this measure may relate to event integration.

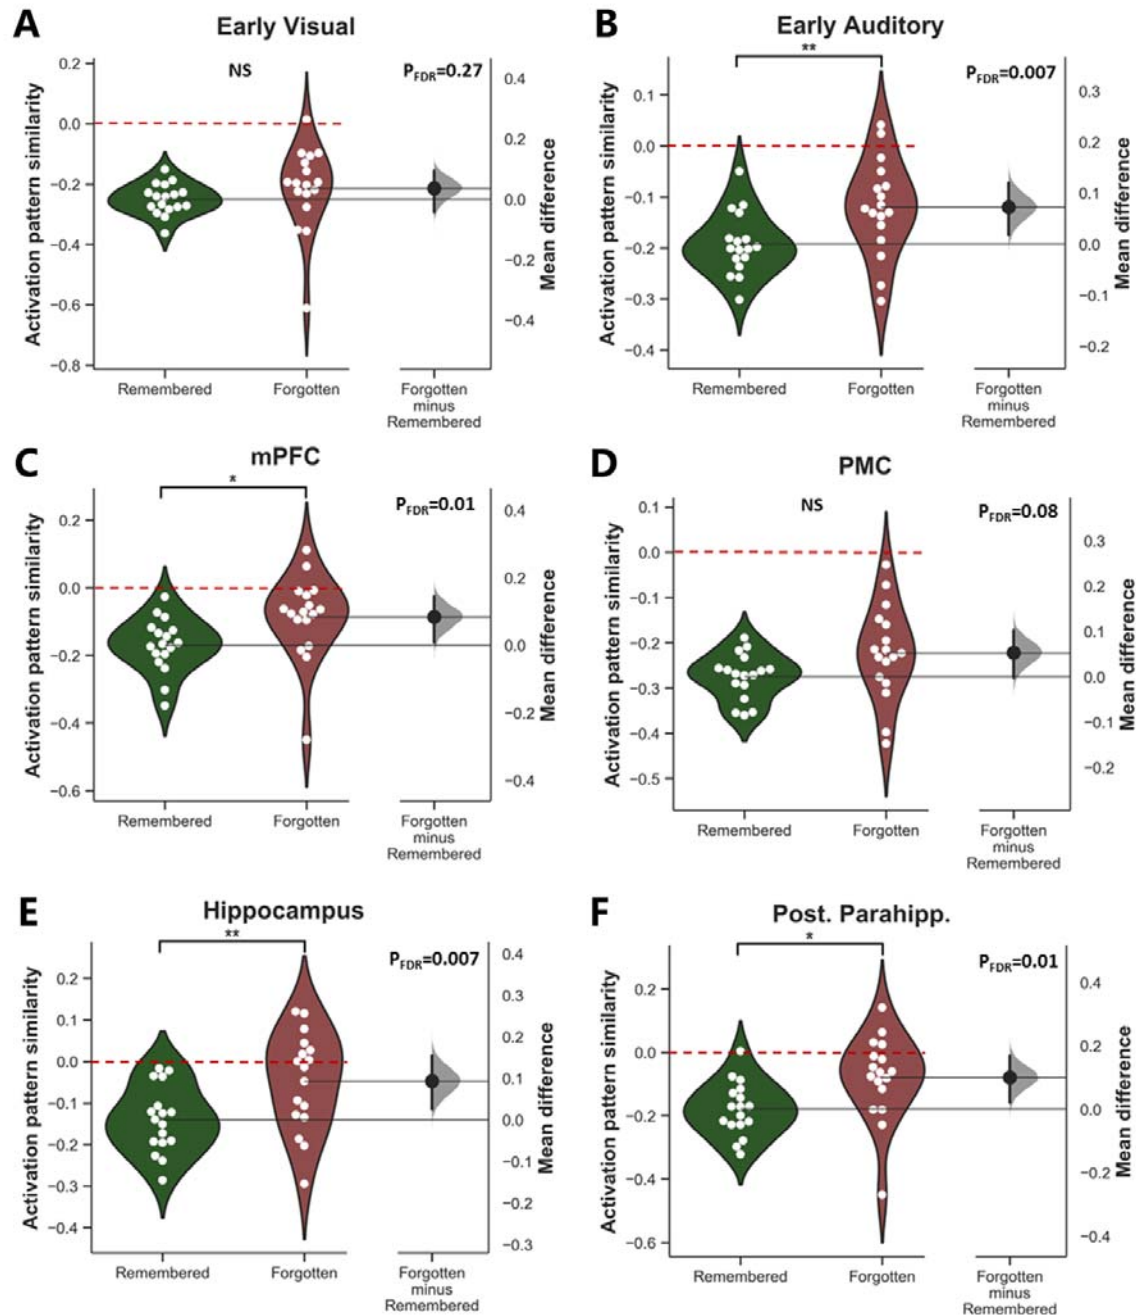

1

2 **Figure 3. Association between activation pattern similarities of six ROIs and subsequent memory recall.** We compared  
3 *activation pattern* similarities of sequential event pairs based on subsequent memory performance of the first event (*Remembered*  
4 *vs. Forgotten*) across six ROIs. For panel A-F, *activation pattern* similarities for *Remembered* events are displayed on the left  
5 (green), while similarities for *Forgotten* events are displayed on the right (red). For each comparison, a separate axis displays the  
6 *mean difference*. The curve (gray) indicates the resampled distribution of the *mean difference* generated via bootstrapping. The  
7 solid vertical line attached to the curve represents the *mean difference* as a 95% bootstrap confidence interval. We found  
8 significantly lower *activation pattern* similarity for *Remembered* vs. *Forgotten* event pairs in the early auditory area ( $t = -3.56$ ,  
9  $p_{FDR} = 0.007$ , Cohen's  $d = 0.92$ ; panel B), mPFC ( $t = -2.79$ ,  $p_{FDR} = 0.01$ , Cohen's  $d = 0.80$ ; panel C), hippocampus ( $t = -3.62$ ,  $p_{FDR}$   
10  $= 0.007$ , Cohen's  $d = 0.92$ ; panel E), and pPHG ( $t = -2.85$ ,  $p_{FDR} = 0.01$ , Cohen's  $d = 0.89$ ; panel F). No significant differences  
11 were found in early visual areas ( $t = -1.13$ ,  $p_{FDR} = 0.27$ , Cohen's  $d = 0.35$ ; panel A) and PMC ( $t = -1.91$ ,  $p_{FDR} = 0.08$ , Cohen's  $d =$   
12  $0.65$ ; panel D). NS=Not significant; \*  $p_{FDR} < 0.05$ ; \*\*  $p_{FDR} < 0.01$ .

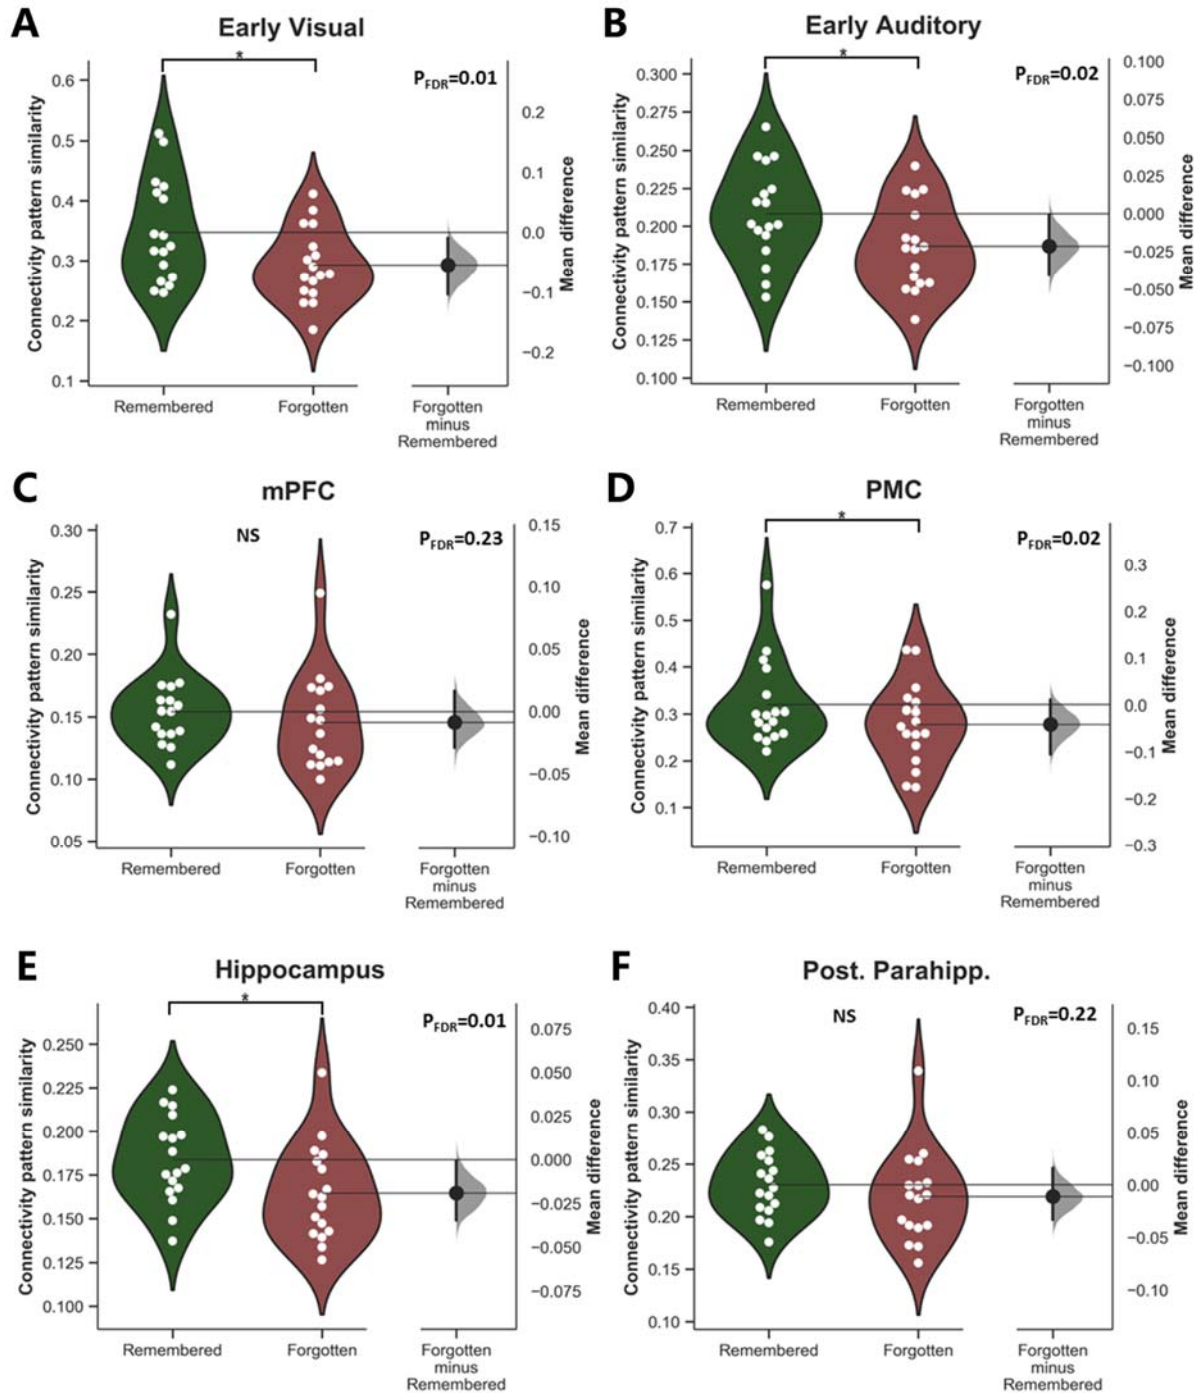

1  
2  
3 **Figure 4. Association between connectivity pattern similarities of six ROIs and subsequent memory recall.** We compared  
4 connectivity pattern similarities of sequential event pairs based on subsequent memory performance of the first event  
5 (*Remembered* vs. *Forgotten*) across six ROIs. For panel A-F, connectivity pattern similarities for *Remembered* events are  
6 displayed on the left (*green*), while similarities for *Forgotten* events are displayed on the right (*red*). For each comparison, a  
7 separate axis displays the *mean difference*. The curve (*gray*) indicates the resampled distribution of the *mean difference* generated  
8 via bootstrapping. The solid vertical line attached to the curve represents the *mean difference* as a 95% bootstrap confidence  
9 interval. We found significantly higher connectivity pattern similarity for *Remembered* (*green*) vs. *Forgotten* (*red*) event pairs in  
10 the early auditory area ( $t = 2.9$ ,  $p_{FDR} = 0.02$ , Cohen's  $d = 0.72$ , panel **B**), visual areas ( $t = 3.34$ ,  $p_{FDR} = 0.01$ , Cohen's  $d = 0.74$ ,  
11 panel **A**), hippocampus ( $t = 3.39$ ,  $p_{FDR} = 0.01$ , Cohen's  $d = 0.73$ , panel **E**), and PMC ( $t = 2.79$ ,  $p_{FDR} = 0.02$ , Cohen's  $d = 0.47$ ,  
12 panel **D**). No significant differences were found in mPFC ( $t = 1.22$ ,  $p_{FDR} = 0.23$ , Cohen's  $d = 0.25$ , panel **C**) and pPHG ( $t = 1.36$ ,  
 $p_{FDR} = 0.22$ , Cohen's  $d = 0.30$ , panel **F**). NS=Not significant; \*  $p_{FDR} < 0.05$ .

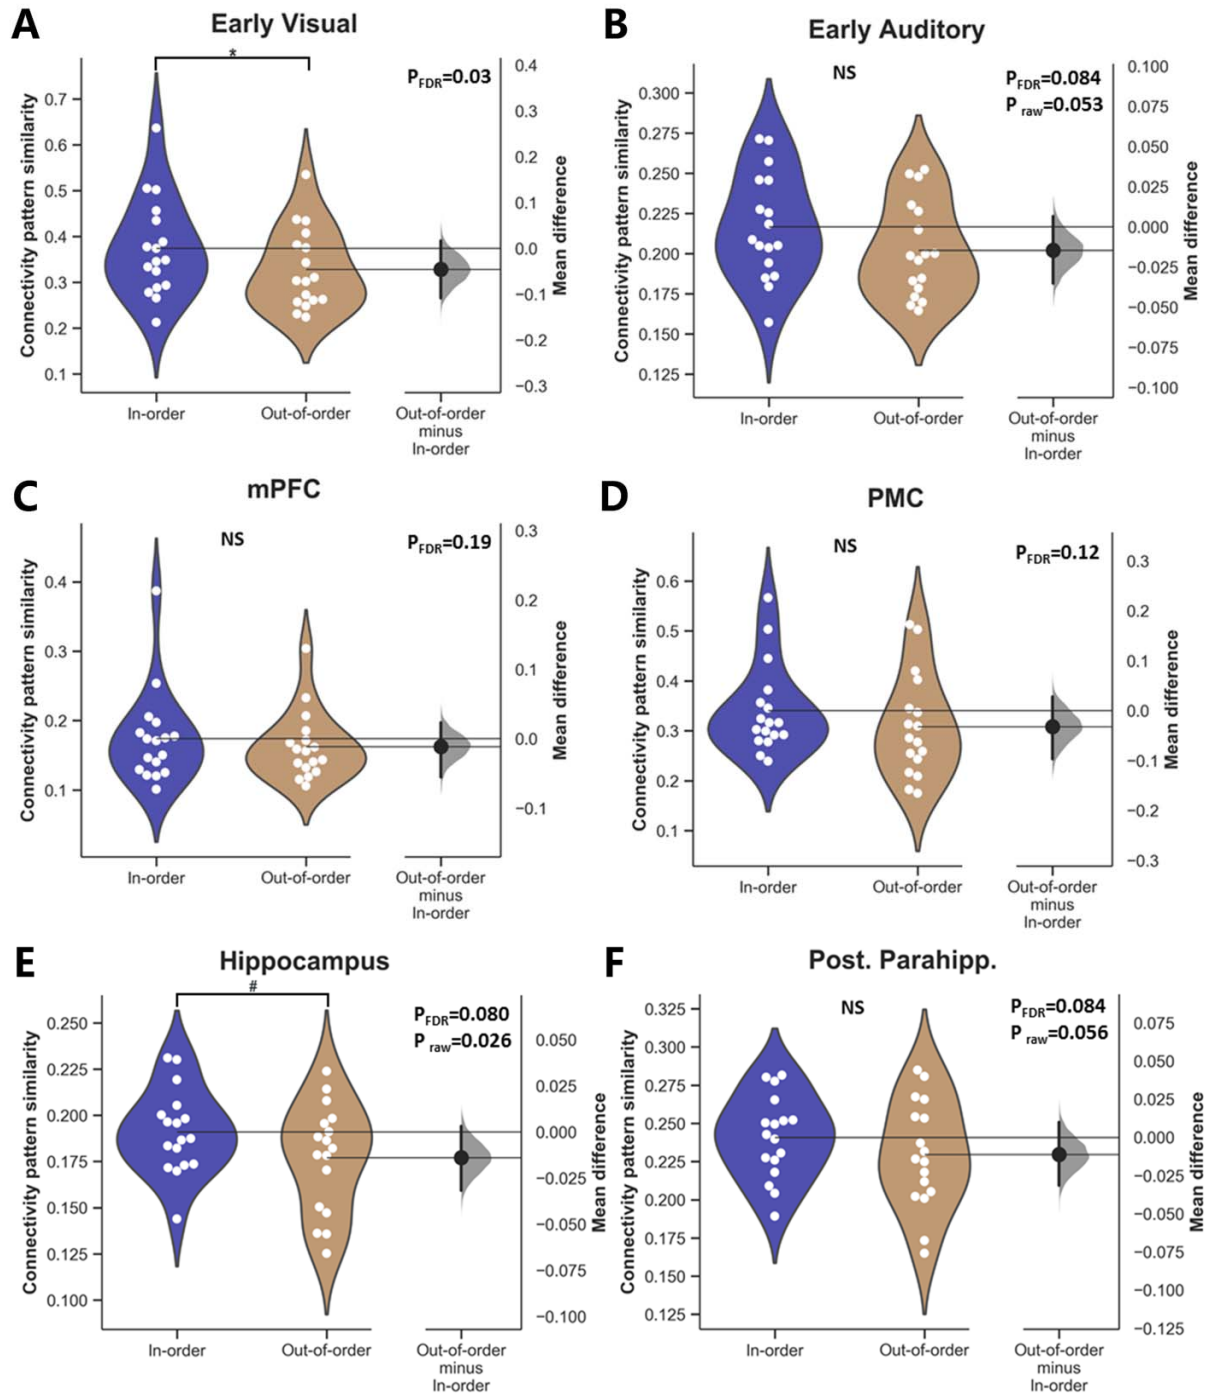

1  
 2 **Figure 5. Association between connectivity pattern similarities of six ROIs and sequential order of memory recall.** We  
 3 compared connectivity pattern similarities of sequential event pairs (*In-order* vs. *Out-of-order*) based on sequential memory  
 4 performance of the first event across six ROIs. For panel A-F, connectivity pattern similarities for *In-order* events are displayed  
 5 on the left (BLUE), while similarities for *Out-of-order* events are displayed on the right (BROWN). Early visual areas ( $t = 3.16$ ,  
 6  $p_{FDR} = 0.03$ , Cohen's  $d = 0.47$ , panel A) demonstrated higher connectivity pattern similarity for the *In-order* events compared to  
 7 *Out-of-order* events. A similar trend was also detected in the hippocampus ( $t = -2.43$ ,  $p_{raw} = 0.026$ , Cohen's  $d = 0.53$ , panel E),  
 8 but it did not survive FDR correction ( $p_{FDR} = 0.08$ ). We also found modest, non-significant trends in the early auditory area ( $t = -$   
 9  $2.08$ ,  $p_{raw} = 0.053$ ,  $p_{FDR} = 0.084$ , Cohen's  $d = 0.46$ , panel B) and posterior parahippocampal gyrus ( $t = -2.05$ ,  $p_{raw} = 0.056$ ,  $p_{FDR} =$   
 10  $0.084$ , Cohen's  $d = 0.36$ , panel F). No similar effects were detected in mPFC ( $t = -1.35$ ,  $p_{FDR} = 0.19$ , Cohen's  $d = 0.19$ , panel C),  
 11 and PMC ( $t = -2.05$ ,  $p_{FDR} = 0.12$ , Cohen's  $d = 0.33$ , panel D). NS=Not significant; \*  $p_{FDR} < 0.05$ ; #  $p_{raw} < 0.05$ .



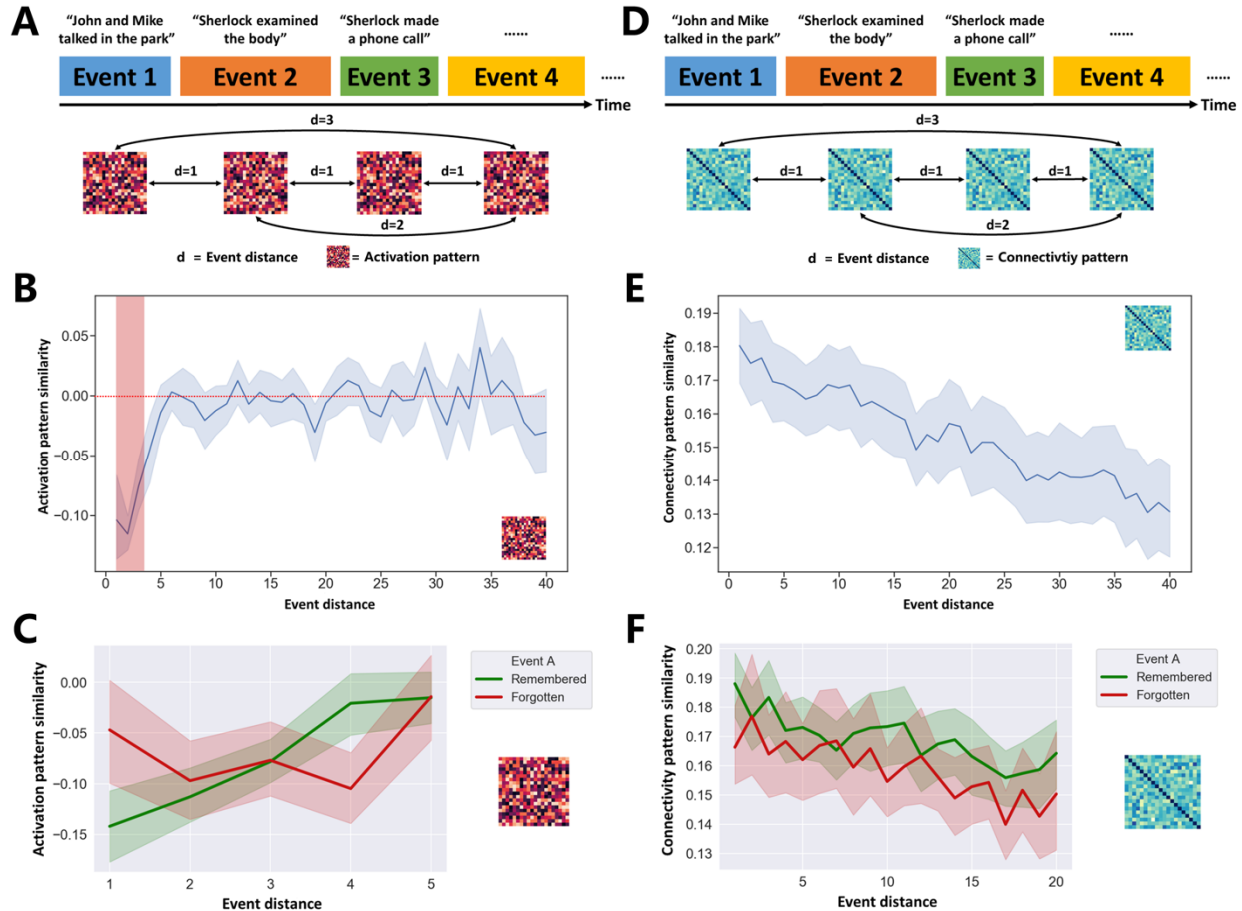

1  
2 **Figure 6. Hippocampal pattern similarity changes with event distance.** (A) Hippocampal *activation patterns* were generated  
3 for all 50 events. We calculated *activation pattern* similarities between sequential events (event distance = 1) and all possible  
4 combinations of non-sequential event pairs (event distance > 1). (B) Hippocampal *activation patterns* between pairs of events  
5 were significantly dissimilar for events separated by a distance of less than 4 (red shadow). (C) Memory performance modulated  
6 the distance-*activation pattern* similarity relationship. If the first event (*Event A*) of the pair was successfully encoded, *activation*  
7 *pattern* similarities of the event pair increased with event distance (green line). (D) Hippocampal *connectivity patterns* were  
8 generated for all possible combinations of event pairs. (E) Event pairs with shorter event distance had more similar hippocampus  
9 *connectivity patterns*. At the same time, similarities of hippocampus *connectivity patterns* are higher than 0 regardless of event  
10 distance. (F) Memory performance modulated distance-*connectivity pattern* similarity relationship. If the first event (*Event A*) of  
11 the event pair was successfully encoded, *connectivity pattern* similarities of the event pair are enhanced regardless of their event  
12 distance. For panel B-F, error bands (i.e., light shadow around the solid line) represent the 95% confidence interval of the mean.

13  
14  
15  
16  
17  
18  
19  
20  
21  
22  
23  
24  
25  
26

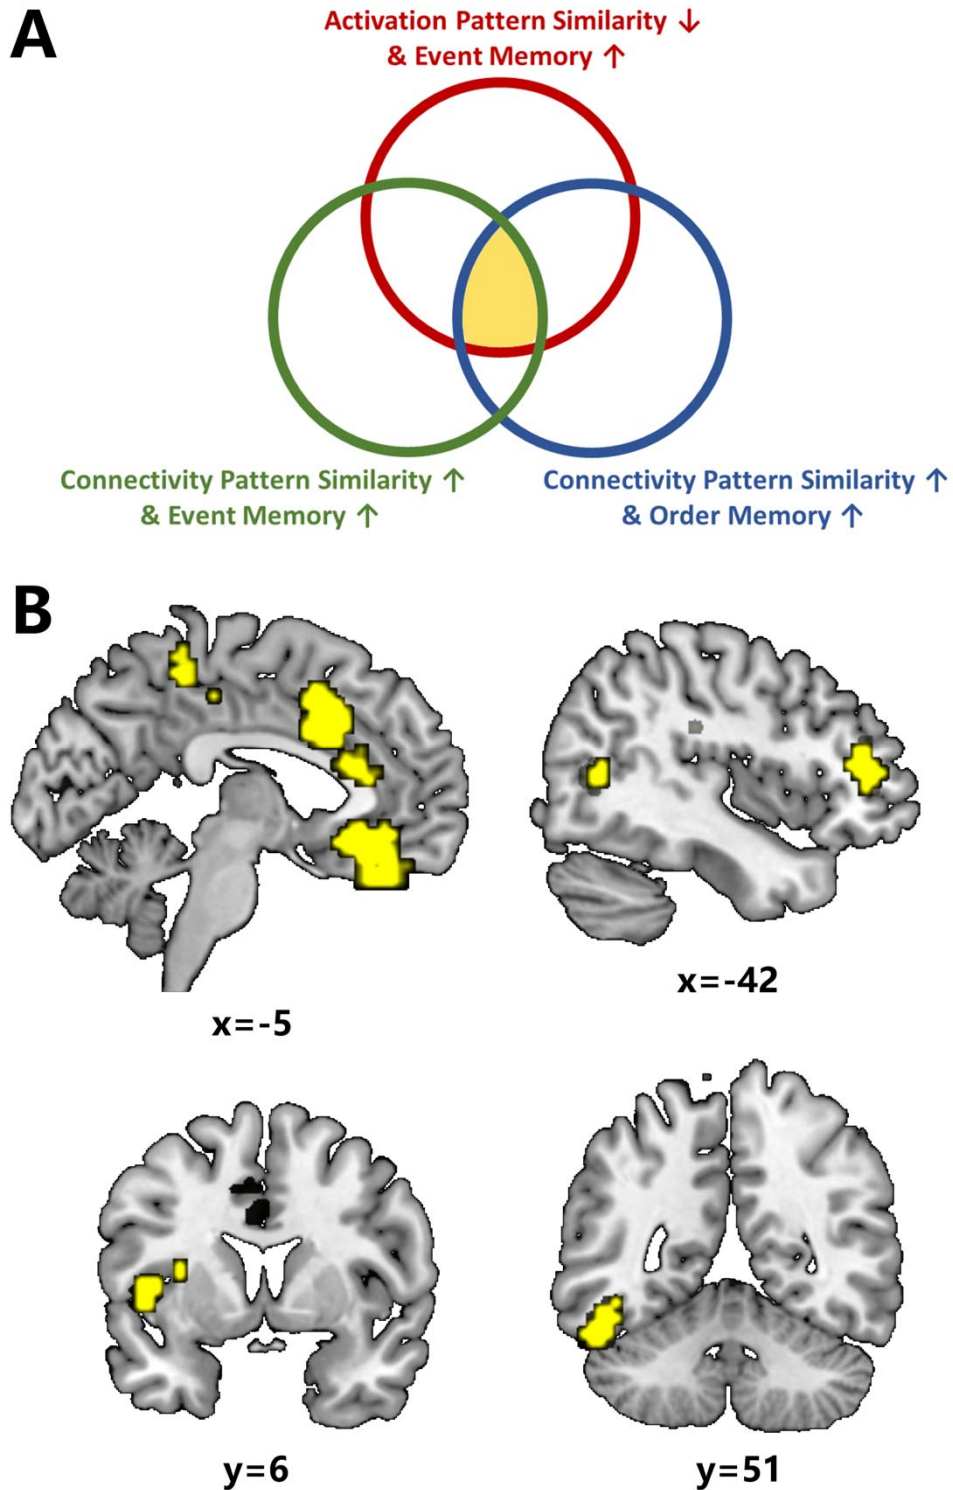

**Figure 7. Identifying overlapping event segmentation and integration computations across the neocortex.** (A) We identified three relationships between neural pattern similarity and subsequent memory in the hippocampus. (B) Similar to the hippocampus, overlapping event segmentation and integration computations were found in a network of brain regions including the medial prefrontal cortex (mPFC), right inferior frontal gyrus (IFG), anterior/middle cingulate cortex and supplementary motor area (SMA), left inferior temporal gyrus (ITG), and left insular ( $p_{FDR} < 0.05$  across 1000 parcels, cluster size  $\geq 50$ ).

1  
2  
3  
4  
5  
6  
7
